# Supplementary material
Source: Springer Nature journal article supplement (https://www.springermedizin.de/resource/supplementary/12889_2014_7118_MOESM1_ESM.pdf/9496836)

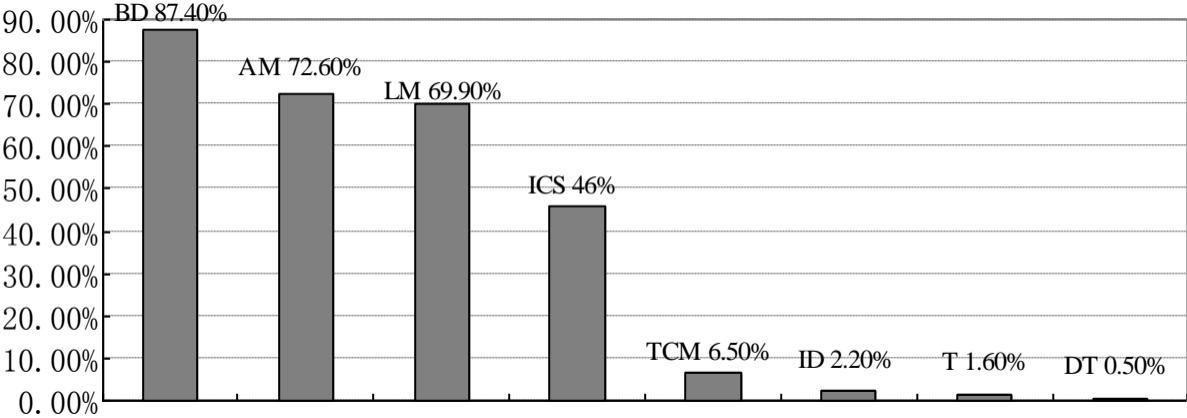

Supplement: MOESM1 [file 9496836]
